# Supplementary material for: Investigating the Relationship between White Matter Connectivity and Motivational Circuits in Subjects with Deficit Schizophrenia: A Diffusion Tensor Imaging (DTI) Study
Source: MDPI journal article supplement (doi:10.3390/jcm11010061), 2021-12-23
Supplement: s1 [file s1]

# Supplementary Materials

**Table S1.** Demographic characteristics, RMS and illness related variables.

|                                 | SCZ<br>( <i>n</i> = 46) | HCs<br>( <i>n</i> = 35) | F     | <i>p</i>     |
|---------------------------------|-------------------------|-------------------------|-------|--------------|
| Age (years)                     | 35.87 ± 7.74            | 32.94 ± 8.80            | 2.521 | 0.116        |
| Gender (M/F)                    | 30/16                   | 17/18                   | 2.269 | 0.136        |
| Paternal education (years)      | 8.52 ± 4.50             | 11.31 ± 5.85            | 5.901 | <b>0.017</b> |
| Maternal education (years)      | 8.46 ± 4.59             | 10.34 ± 5.67            | 2.732 | 0.102        |
| RMS                             | 0.40 ± 0.11             | 0.34 ± 0.10             | 6.339 | <b>0.014</b> |
| Total SDS                       | 8.55 ± 6.04             |                         |       |              |
| SDS Experiential Domain         | 5.16 ± 3.53             |                         |       |              |
| SDS Expressive Deficit          | 3.39 ± 2.79             |                         |       |              |
| PANSS Positive                  | 7.73 ± 4.02             |                         |       |              |
| PANSS Disorganization           | 7.29 ± 3.70             |                         |       |              |
| PANSS Depression                | 2.31 ± 0.89             |                         |       |              |
| Chlorpromazine equivalent doses | 379.52 ± 184.30         |                         |       |              |

HCs: healthy controls; PANSS: Positive and Negative Syndrome Scale; RMS: root-mean-square of the movement during the examination; SCZ: subjects with schizophrenia; SDS: Schedule for the Deficit Syndrome. *p* values in boldface indicate statistical significance.

**Table S2.** Group differences between SCZ and HCs in CI.

| Brain Pathways | SCZ ( <i>n</i> = 46) | HCs ( <i>n</i> = 35) | F     | <i>p</i> |
|----------------|----------------------|----------------------|-------|----------|
| CI             |                      |                      |       |          |
| INAcc to daIC  | 9.64 ± 13.23         | 9.36 ± 10.88         | 0.174 | 0.678    |
| INAcc to DLPFC | 36.23 ± 50.80        | 49.31 ± 101.35       | 0.144 | 0.706    |
| INAcc to IOFC  | 116.90 ± 194.15      | 120.02 ± 156.09      | 0.035 | 0.851    |
| INAcc to mOFC  | 2150.29 ± 1206.57    | 2903.13 ± 1783.21    | 3.897 | 0.052    |
| INAcc to pIC   | 665.960 ± 680.30     | 463.43 ± 408.79      | 2.261 | 0.137    |
| INAcc to vaIC  | 763.58 ± 680.40      | 920.90 ± 881.79      | 0.485 | 0.488    |
| lAmy to daIC   | 59.12 ± 62.03        | 69.33 ± 69.13        | 0.721 | 0.398    |
| lAmy to DLPFC  | 37.02 ± 33.59        | 53.3 ± 46.16         | 1.536 | 0.219    |
| lAmy to IOFC   | 214.58 ± 194.25      | 143.28 ± 160.88      | 1.268 | 0.264    |
| lAmy to IOFC   | 786.81 ± 518.29      | 1012.18 ± 647.54     | 1.974 | 0.164    |
| lAmy to pIC    | 2397.00 ± 1861.81    | 1748.80 ± 1274.76    | 5.031 | 0.028    |
| lAmy to vaIC   | 2425.25 ± 1115.23    | 2908.10 ± 1094.67    | 2.880 | 0.094    |
| IVTA to daIC   | 48.93 ± 82.51        | 33.06 ± 41.98        | 0.189 | 0.665    |
| IVTA to DLPFC  | 115.45 ± 148.71      | 129.57 ± 85.92       | 0.887 | 0.349    |
| IVTA to IOFC   | 79.70 ± 75.88        | 126.96 ± 140.15      | 3.299 | 0.073    |
| IVTA to mOFC   | 69.30 ± 88.54        | 102.19 ± 131.15      | 2.018 | 0.159    |
| IVTA to pIC    | 72.98 ± 87.49        | 46.88 ± 58.16        | 2.351 | 0.129    |
| IVTA to vaIC   | 15.60 ± 25.0         | 16.54 ± 17.90        | 0.044 | 0.835    |
| rNAcc to daIC  | 11.34 ± 40.13        | 7.99 ± 16.06         | 0.173 | 0.679    |
| rNAcc to DLPFC | 18.28 ± 25.30        | 31.69 ± 59.31        | 1.742 | 0.191    |
| rNAcc to IOFC  | 469.80 ± 516.11      | 583.00 ± 575.02      | 0.159 | 0.691    |
| rNAcc to mOFC  | 1412.45 ± 983.46     | 2216.77 ± 1315.54    | 7.012 | 0.010    |
| rNAcc to pIC   | 121.37 ± 224.47      | 80.98 ± 92.41        | 0.013 | 0.909    |
| rNAcc to vaIC  | 857.14 ± 1076.35     | 718.38 ± 700.50      | 0.288 | 0.593    |
| rAmy to daIC   | 11.74 ± 15.35        | 7.82 ± 9.24          | 2.701 | 0.104    |
| rAmy to DLPFC  | 19.72 ± 22.12        | 38.16 ± 32.92        | 8.625 | 0.004    |

|               |                   |                  |       |       |
|---------------|-------------------|------------------|-------|-------|
| rAmy to IOFC  | 88.38 ± 93.76     | 129.18 ± 107.97  | 1.352 | 0.249 |
| rAmy to mOFC  | 1186.24 ± 1029.05 | 1075.12 ± 992.10 | 0.181 | 0.672 |
| rAmy to pIC   | 85.23 ± 142.44    | 70.62 ± 80.30    | 1.007 | 0.319 |
| rAmy to vaIC  | 752.55 ± 803.84   | 631.73 ± 508.82  | 0.999 | 0.321 |
| rVTA to daIC  | 22.15 ± 38.45     | 35.64 ± 59.95    | 1.214 | 0.274 |
| rVTA to DLPFC | 113.66 ± 91.09    | 148.46 ± 124.59  | 2.691 | 0.105 |
| rVTA to IOFC  | 132.76 ± 159.34   | 134.87 ± 151.53  | 0.029 | 0.864 |
| rVTA to mOFC  | 59.33 ± 86.00     | 52.22 ± 91.28    | 0.206 | 0.651 |
| rVTA to pIC   | 17.926 ± 33.60    | 14.17 ± 18.00    | 0.260 | 0.612 |
| rVTA to vaIC  | 11.18 ± 12.97     | 17.54 ± 18.96    | 1.100 | 0.298 |

Amy: amygdala; CI: connectivity index; daIC: dorsal-anterior insular cortex; DLPFC: dorso-lateral prefrontal cortex; HCs: healthy controls; l: left; IOFC: lateral orbito-frontal cortex; mOFC: medial orbito-frontal cortex; NAcc: nucleus accumbens; pIC: posterior insular cortex; r: right; SCZ: subjects with schizophrenia; vaIC: ventral-anterior insular cortex; VTA: ventral tegmental area.

**Table S3.** Group differences between SCZ and HCs in FA.

| Brain Pathways | SCZ ( <i>n</i> = 46) | HCs ( <i>n</i> = 35) | F     | <i>p</i> |
|----------------|----------------------|----------------------|-------|----------|
| FA             |                      |                      |       |          |
| INAcc to daIC  | 1.49 ± 1.19          | 1.60 ± 1.20          | 0.051 | 0.822    |
| INAcc to DLPFC | 3.03 ± 3.47          | 3.27 ± 3.55          | 0.408 | 0.525    |
| INAcc to IOFC  | 7.01 ± 9.85          | 7.32 ± 7.66          | 0.000 | 0.984    |
| INAcc to mOFC  | 52.24 ± 32.23        | 63.01 ± 46.42        | 1.290 | 0.260    |
| INAcc to pIC   | 40.52 ± 41.81        | 28.20 ± 22.57        | 2.373 | 0.128    |
| INAcc to vaIC  | 32.31 ± 27.78        | 29.48 ± 20.19        | 0.315 | 0.576    |
| lAmy to daIC   | 6.29 ± 4.88          | 6.78 ± 5.80          | 1.309 | 0.256    |
| lAmy to DLPFC  | 1058.06 ± 174.46     | 1030.49 ± 232.41     | 0.394 | 0.532    |
| lAmy to IOFC   | 0.91 ± 1.24          | 0.86 ± 0.91          | 0.100 | 0.753    |
| lAmy to mOFC   | 11.30 ± 15.96        | 6.74 ± 9.25          | 0.660 | 0.419    |
| lAmy to pIC    | 56.14 ± 36.30        | 45.06 ± 27.15        | 3.298 | 0.073    |
| lAmy to vaIC   | 43.51 ± 17.10        | 51.67 ± 22.79        | 4.251 | 0.043    |
| lVTA to daIC   | 4.43 ± 5.32          | 4.12 ± 3.99          | 0.107 | 0.745    |
| lVTA to DLPFC  | 7.81 ± 8.34          | 8.36 ± 4.55          | 0.636 | 0.428    |
| lVTA to IOFC   | 7.87 ± 5.85          | 10.04 ± 8.15         | 2.266 | 0.136    |
| lVTA to mOFC   | 5.94 ± 5.00          | 8.04 ± 6.98          | 3.787 | 0.055    |
| lVTA to pIC    | 5.73 ± 5.10          | 3.76 ± 3.35          | 4.406 | 0.039    |
| lVTA to vaIC   | 1.89 ± 1.32          | 2.01 ± 1.12          | 0.003 | 0.956    |
| rNAcc to daIC  | 1.69 ± 3.15          | 1.14 ± 0.94          | 0.727 | 0.397    |
| rNAcc to DLPFC | 2.09 ± 2.70          | 2.82 ± 4.03          | 0.714 | 0.401    |
| rNAcc to IOFC  | 21.54 ± 21.88        | 24.17 ± 20.67        | 0.001 | 0.976    |
| rNAcc to mOFC  | 57.38 ± 42.42        | 81.19 ± 54.45        | 2.762 | 0.101    |
| rNAcc to pIC   | 9.29 ± 13.66         | 7.32 ± 6.61          | 0.029 | 0.866    |
| rNAcc to vaIC  | 37.20 ± 35.79        | 26.54 ± 19.49        | 2.084 | 0.153    |
| rAmy to daIC   | 2.39 ± 1.98          | 1.85 ± 1.24          | 1.153 | 0.286    |
| rAmy to DLPFC  | 16.94 ± 10.55        | 15.21 ± 11.37        | 0.431 | 0.513    |
| rAmy to IOFC   | 1.28 ± 1.42          | 1.72 ± 2.99          | 2.611 | 0.110    |
| rAmy to mOFC   | 8.38 ± 8.02          | 9.39 ± 9.86          | 0.220 | 0.640    |
| rVTA to daIC   | 3.55 ± 6.78          | 3.97 ± 4.86          | 0.231 | 0.632    |
| rVTA to DLPFC  | 7.92 ± 5.46          | 8.44 ± 5.63          | 0.476 | 0.492    |
| rVTA to IOFC   | 11.06 ± 10.87        | 9.24 ± 8.24          | 0.475 | 0.493    |
| rVTA to mOFC   | 6.14 ± 5.62          | 5.17 ± 8.93          | 0.123 | 0.727    |
| rVTA to pIC    | 2.10 ± 2.36          | 1.76 ± 1.26          | 0.488 | 0.487    |

|              |                 |                 |       |       |
|--------------|-----------------|-----------------|-------|-------|
| rVTA to vaIC | $1.71 \pm 1.23$ | $2.10 \pm 1.38$ | 0.669 | 0.416 |
|--------------|-----------------|-----------------|-------|-------|

Amy: amygdala; daIC: dorsal-anterior insular cortex; DLPFC: dorso-lateral prefrontal cortex; FA: fractional anisotropy; HCs: healthy controls; l: left; IOFC: lateral orbito-frontal cortex; mOFC: medial orbito-frontal cortex; NAcc: nucleus accumbens; pIC: posterior insular cortex; r: right; SCZ: subjects with schizophrenia; vaIC: ventral-anterior insular cortex; VTA: ventral tegmental area.

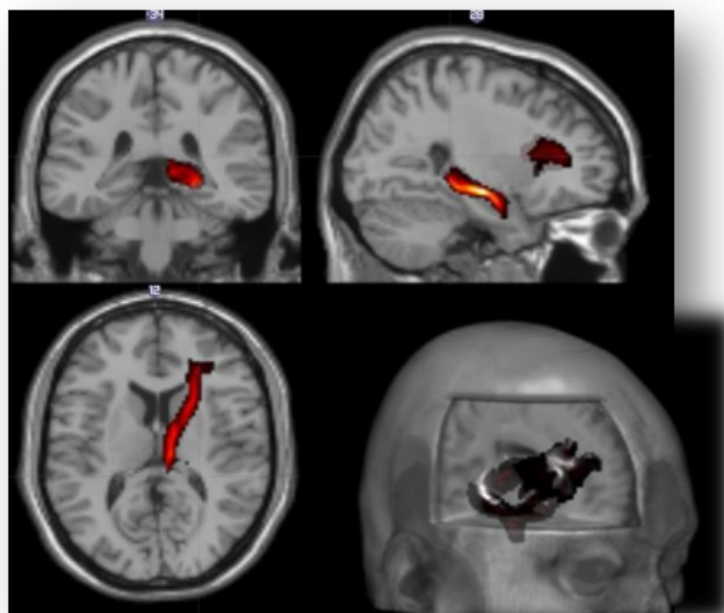

**Figure S1.** 3D representation of the average distribution of the connection patterns between the right amygdala and the ipsilateral dorsolateral prefrontal cortex.

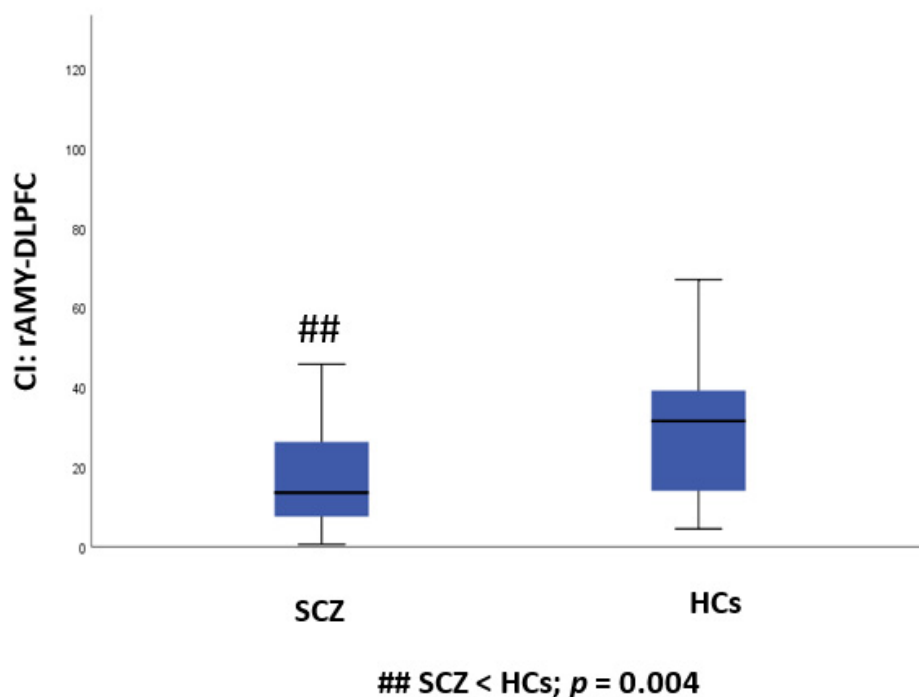

**Figure S2.** Group differences between SCZ and HCs in the CI of the pathway connecting right amygdala and the ipsilateral dorsolateral prefrontal cortex. **CI:** Connectivity index; **rAmy:** right amygdala; **dIPFC:** dorsolateral prefrontal cortex; **SCZ:** subjects with schizophrenia; **HCs:** healthy controls.
